# Supplementary material for: Weed Hosts Represent an Important Reservoir of Turnip Yellows Virus and a Possible Source of Virus Introduction into Oilseed Rape Crop
Source: MDPI journal article supplement (doi:10.3390/v14112511), 2022-11-13
Supplement: s1 [file s1]

**Supplementary Table S1.** The plant sample tested for turnip yellows virus.

| Plant Species                             | Plant Family           | Number of Tested Plant | Number of TuYV Detected Plant by RT-PCR |
|-------------------------------------------|------------------------|------------------------|-----------------------------------------|
| <i>Achillea millefolium</i>               | <i>Asteraceae</i>      | 1                      | 0                                       |
| <i>Amaranthus retroflexus</i>             | <i>Amaranthaceae</i>   | 1                      | 1                                       |
| <i>Anchusa arvensis</i>                   | <i>Boraginaceae</i>    | 2                      | 0                                       |
| <i>Arctium lappa</i>                      | <i>Asteraceae</i>      | 2                      | 1                                       |
| <i>Atriplex patula</i>                    | <i>Amaranthaceae</i>   | 2                      | 2                                       |
| <i>Barbarea vulgaris</i>                  | <i>Brassicaceae</i>    | 2                      | 0                                       |
| <i>Brassica napus</i>                     | <i>Brassicaceae</i>    | 184                    | 78                                      |
| <i>Brassica napus</i> (volunteer)         | <i>Brassicaceae</i>    | 15                     | 7                                       |
| <i>Capsella bursa - pastoris</i>          | <i>Brassicaceae</i>    | 10                     | 2                                       |
| <i>Descurainia sophia</i>                 | <i>Brassicaceae</i>    | 14                     | 8                                       |
| <i>Euphorbia helioscopia</i>              | <i>Euphorbiaceae</i>   | 10                     | 3                                       |
| <i>Fagopyrum esculentum</i>               | <i>Polygonaceae</i>    | 2                      | 0                                       |
| <i>Fallopia convolvulus</i>               | <i>Polygonaceae</i>    | 2                      | 1                                       |
| <i>Fumaria officinalis</i>                | <i>Papaveraceae</i>    | 13                     | 4                                       |
| <i>Galinsoga parviflora</i>               | <i>Asteraceae</i>      | 1                      | 0                                       |
| <i>Galium aparine</i>                     | <i>Rubiaceae</i>       | 2                      | 0                                       |
| <i>Geranium rotundifolium</i>             | <i>Geraniaceae</i>     | 6                      | 2                                       |
| <i>Chenopodium album</i>                  | <i>Amaranthaceae</i>   | 4                      | 0                                       |
| <i>Lactuca serriola</i>                   | <i>Asteraceae</i>      | 3                      | 1                                       |
| <i>Lamium purpureum</i>                   | <i>Lamiaceae</i>       | 4                      | 1                                       |
| <i>Lotus corniculatus</i>                 | <i>Fabaceae</i>        | 1                      | 0                                       |
| <i>Mercurialis annua</i>                  | <i>Euphorbiaceae</i>   | 6                      | 0                                       |
| <i>Papaver rhoeas</i>                     | <i>Papaveraceae</i>    | 12                     | 6                                       |
| <i>Phacelia tanacetifolia</i> (intercrop) | <i>Boraginaceae</i>    | 4                      | 3                                       |
| <i>Plantago lanceolata</i>                | <i>Plantaginaceae</i>  | 3                      | 0                                       |
| <i>Raphanus raphanistrum</i>              | <i>Brassicaceae</i>    | 5                      | 3                                       |
| <i>Rumex obtusifolius</i>                 | <i>Polygonaceae</i>    | 2                      | 0                                       |
| <i>Silene alba</i>                        | <i>Caryophyllaceae</i> | 7                      | 1                                       |
| <i>Sinapis alba</i> (intercrop)           | <i>Brassicaceae</i>    | 25                     | 14                                      |
| <i>Solanum nigrum</i>                     | <i>Solanaceae</i>      | 1                      | 1                                       |
| <i>Sonchus arvensis</i>                   | <i>Asteraceae</i>      | 3                      | 0                                       |
| <i>Stellaria media</i>                    | <i>Caryophyllaceae</i> | 4                      | 1                                       |
| <i>Sisymbrium officinale</i>              | <i>Brassicaceae</i>    | 2                      | 1                                       |
| <i>Taraxacum officinale</i>               | <i>Asteraceae</i>      | 5                      | 1                                       |
| <i>Thlaspi arvense</i>                    | <i>Brassicaceae</i>    | 13                     | 6                                       |
| <i>Trifolium repens</i>                   | <i>Fabaceae</i>        | 2                      | 0                                       |

---

|                                  |                       |            |            |
|----------------------------------|-----------------------|------------|------------|
| <i>Tripleurospermum inodorum</i> | <i>Asteraceae</i>     | 3          | 1          |
| <i>Urtica dioica</i>             | <i>Urticaceae</i>     | 5          | 1          |
| <i>Veronica persica</i>          | <i>Plantaginaceae</i> | 4          | 1          |
| <i>Vicia hirsuta</i>             | <i>Fabaceae</i>       | 2          | 0          |
| <i>Viola arvensis</i>            | <i>Violaceae</i>      | 24         | 9          |
| <b>Total</b>                     | <b>17</b>             | <b>413</b> | <b>160</b> |

**Supplementary Table S2.** Primers used in this study.

| Primer Name    | Sequence (3′-5′)             | Nucleotide Position (MN497806) | PCR Fragment Length (bp) | Detection Methods | qPCR Efficiency | Reference     |
|----------------|------------------------------|--------------------------------|--------------------------|-------------------|-----------------|---------------|
| luteoviruses-F | GCTCTAGAATTGTTAATGAITACGGTCG | Generic Primery                | 610                      | RT-PCR            |                 | [33]          |
| luteoviruses-R | CACGCGTCIACCTATTTIGGITTITG   |                                |                          |                   |                 |               |
| TuYVF-K1       | TACGGTCGTGGGTAGGAGAA         | 3488-3507                      | 185                      | qPCR              | 1.98            | In this study |
| TuYVR-K1       | TCGAACCTGCTCCTCTGGTA         | 3672-3653                      |                          |                   |                 |               |
| TuYVF-K2       | GAGCTGGACCCACACTGTA          | 3867-3885                      | 136                      |                   | 1.90            | [34]          |
| TuYVR-K2       | ATTGGTCCTCGGCAACGTCG         | 4002-3983                      |                          |                   |                 |               |
| TuYV_5cpF      | ATCCAGCGTCCGTTGAACTT         | 3206-3225                      | 797                      | RT-PCR/Sequencing |                 | In this study |
| TuYVR-K2       | ATTGGTCCTCGGCAACGTCG         | 4002-3983                      |                          |                   |                 | [34]          |
| TuYV_5rtpF     | CGACCTAGACGACGACGAAG         | 3603-3622                      | 1072                     | Sequencing        |                 | In this study |
| TuYV_5rtpR     | CAGCGGGTCCAACAACAAAG         | 4674-4655                      |                          |                   |                 |               |
| TuYV_3rtpF     | AACCAACCTCAAGCACCACA         | 4399-4418                      | 670                      |                   |                 |               |
| TuYVF6-AS      | TTTGACGACATAGCCTCTTC         | 5068-5049                      |                          |                   |                 |               |
| TuYV3terF1     | CCGGAGAAGGAAAACCTCCGA        | 4857-4876                      | 696                      |                   |                 |               |
| TuYV3terR1     | TCGCCTCGTATCACTACCAAC        | 5552-5532                      |                          |                   |                 |               |

**Table S3.** TuYV isolates from the Czech and Slovak Republics and reference isolates of the read-through domain (RTD) gene sequence analyzed in this study.

| Host                             | Location                       | Virus Isolate    | Accession Number |
|----------------------------------|--------------------------------|------------------|------------------|
| <i>Brassica napus</i>            | Praha, Czech Republic          | No28dobrovizCZ   | OP699023         |
| <i>Brassica napus</i>            | Praha, Czech Republic          | No39stredCZ      | OP699024         |
| <i>Brassica napus</i>            | Kladno, Czech Republic         | No14pokornyCZ    | OP699025         |
| <i>Brassica napus</i>            | Kladno, Czech Republic         | No25kdolinuCZ    | OP699026         |
| <i>Brassica napus</i>            | Mělník, Czech Republic         | No33repinCZ      | OP699027         |
| <i>Brassica napus</i>            | Mělník, Czech Republic         | NoA3repinCZ      | OP699028         |
| <i>Brassica napus</i>            | Mělník, Czech Republic         | NoA9melnikCZ     | OP699029         |
| <i>Brassica napus</i>            | Mladé Boleslav, Czech Republic | NoA13breznoCZ    | OP699030         |
| <i>Brassica napus</i>            | Chomutov, Czech Republic       | NoA2beznoCZ      | OP699031         |
| <i>Brassica napus</i>            | Senec, Slovak Republic         | NoS12vbielSK     | OP699032         |
| <i>Brassica napus</i>            | Galanta, Slovak Republic       | NoS2vulanySK     | OP699033         |
| <i>Arctium lappa</i>             | Mělník, Czech Republic         | No28repinCZ      | OP699034         |
| <i>Capsella bursa-pastoris</i>   | Praha, Czech Republic          | NoC8cenkovCZ     | OP699035         |
| <i>Capsella bursa-pastoris</i>   | Galanta, Slovak Republic       | NoS3jelkaSK      | OP699036         |
| <i>Descurainia sophia</i>        | Kladno, Czech Republic         | No16pokornyCZ    | OP699037         |
| <i>Descurainia sophia</i>        | Praha, Czech Republic          | No24dobrovizCZ   | OP699038         |
| <i>Euphorbia helioscopia</i> #   | Mělník, Czech Republic         | No35repinCZ      | OP699049         |
| <i>Fumaria officinalis</i> #     | Mělník, Czech Republic         | No29repinCZ      | OP699050         |
| <i>Geranium rotundifolium</i> #  | Kladno, Czech Republic         | No12pokornyCZ    | OP699021         |
| <i>Lamium purpureum</i> #        | Mělník, Czech Republic         | No37repinCZ      | OP699022         |
| <i>Papaver rhoeas</i>            | Kladno, Czech Republic         | No8agrosCZ       | OP699039         |
| <i>Papaver rhoeas</i>            | Mělník, Czech Republic         | No30repinCZ      | OP699040         |
| <i>Papaver rhoeas</i>            | Chomutov, Czech Republic       | No49beznoCZ      | OP699041         |
| <i>Papaver rhoeas</i>            | Senec, Slovak Republic         | NoS11velbielSK   | OP699042         |
| <i>Phacelia tanacetifolia</i>    | Mělník, Czech Republic         | NoC9melnikCZ     | OP699043         |
| <i>Sinapis alba</i>              | Kladno, Czech Republic         | No10louckaCZ     | OP699044         |
| <i>Sisymbrium officinale</i>     | Kladno, Czech Republic         | No15pokornyCZ    | OP699045         |
| <i>Stellaria media</i> #         | Kladno, Czech Republic         | No3zajezdCZ      | OP699051         |
| <i>Thlaspi arvense</i>           | Praha, Czech Republic          | No47tuchmericeCZ | OP699046         |
| <i>Tripleurospermum inodorum</i> | Mělník, Czech Republic         | No43repinCZ      | OP699047         |
| <i>Veronica persica</i> #        | Kladno, Czech Republic         | No3agrosCZ       | OP699053         |
| <i>Veronica persica</i> #        | Galanta, Slovak Republic       | No4jelkaSK       | OP699052         |
| <i>Viola arvensis</i>            | Žilina, Slovak Republic        | NoS1strazaSK     | OP699048         |
| <i>Brassica napus</i>            | Greece                         | Geo15            | MT955611         |
| <i>Brassica napus</i>            | Greece                         | Geo7             | MT955610         |
| <i>Brassica napus</i>            | Greece                         | 1_1              | MT955607         |

|                              |             |                |           |
|------------------------------|-------------|----------------|-----------|
| <i>Brassica napus</i>        | Greece      | 12             | MT955609  |
| <i>Brassica napus</i>        | Greece      | Geo1           | MT955608  |
| <i>Brassica napus</i>        | Australia   | MK106          | MT586584  |
| <i>Brassica napus</i>        | Australia   | C2016b         | MT586588  |
| <i>Brassica napus</i>        | Australia   | MK105          | MT586595  |
| <i>Brassica napus</i>        | Australia   | C20            | MT586597  |
| <i>Brassica napus</i>        | Australia   | 5514b          | MT586576  |
| <i>Brassica napus</i>        | Australia   | MK107          | MT586590  |
| <i>Brassica napus</i>        | Australia   | 5514b          | MT586576  |
| <i>Brassica napus</i>        | Japan       | NAPBrYV        | LC428361  |
| <i>Lactuca sativa</i>        | France      | FL1            | NC_003743 |
| <i>Pisum sativum</i>         | UK          | The Deepings   | OK030792  |
| <i>Pisum sativum</i>         | UK          | Cambridge      | OK030793  |
| <i>Pisum sativum</i>         | UK          | Canterbury     | OK030767  |
| <i>Pisum sativum</i>         | UK          | Chirnside      | OK030785  |
| <i>Pisum sativum</i>         | Germany     | Salzlandkreis  | MN497803  |
| <i>Pisum sativum</i>         | Germany     | Muenster17     | MN497806  |
| <i>Pisum sativum</i>         | Germany     | JKI29344       | MK450520  |
| <i>Pisum sativum</i>         | Germany     | Salzlandkreis  | MN497802  |
| <i>Pisum sativum</i>         | Germany     | Salzlandkreis  | MN497804  |
| <i>Pisum sativum</i>         | Australia   | MK109          | MT586579  |
| <i>Sinapis arvensis</i>      | Australia   | 5248           | MT586581  |
| <i>Lens culinaris</i>        | Australia   | MK113          | MT586589  |
| <i>Allium sativum</i>        | Australia   | 5752           | LC701523  |
| <i>Lens culinaris</i>        | Australia   | L314           | MT586574  |
| <i>Arachis hypogaea</i>      | Turkey      | EDI1           | MZ442679  |
| <i>Raphanus raphanistrum</i> | Germany     | JKI29345       | MK450519  |
| <i>Physalis pubescens</i>    | Germany     | DSMZPV1209     | MW854285  |
| <i>Beta vulgaris</i>         | Australia   | Br12           | MT586598  |
| <i>Cicer arietinum</i>       | Australia   | 5511           | MT586596  |
| <i>Nicotiana tabacum</i>     | China       | Anhui          | KR706247  |
| <i>Brassica oleracea</i>     | Philippines | 21706265BrYV   | MW537050  |
| <i>Brassica oleracea</i>     | Brazil      | BrYV Bra1      | MZ313372  |
| <i>Brassica rapa</i>         | South_Korea | CheongsongBrYV | KF923236  |
| <i>Raphanus raphanistrum</i> | Australia   | BrYV-Tas       | OM469309  |
| <i>Beta vulgaris</i>         | UK          | BChV2a         | NC_002766 |

#partial RTD sequence and not included in sequence analysis.
